# Supplementary material for: Liver cirrhosis in HIV/HCV‐coinfected individuals is related to NK cell dysfunction and exhaustion, but not to an impaired NK cell modulation by CD4+ T‐cells
Source: PubMed Central journal article supplement (PMC6752153; doi:10.1002/jia2.25375), 2019-09-19

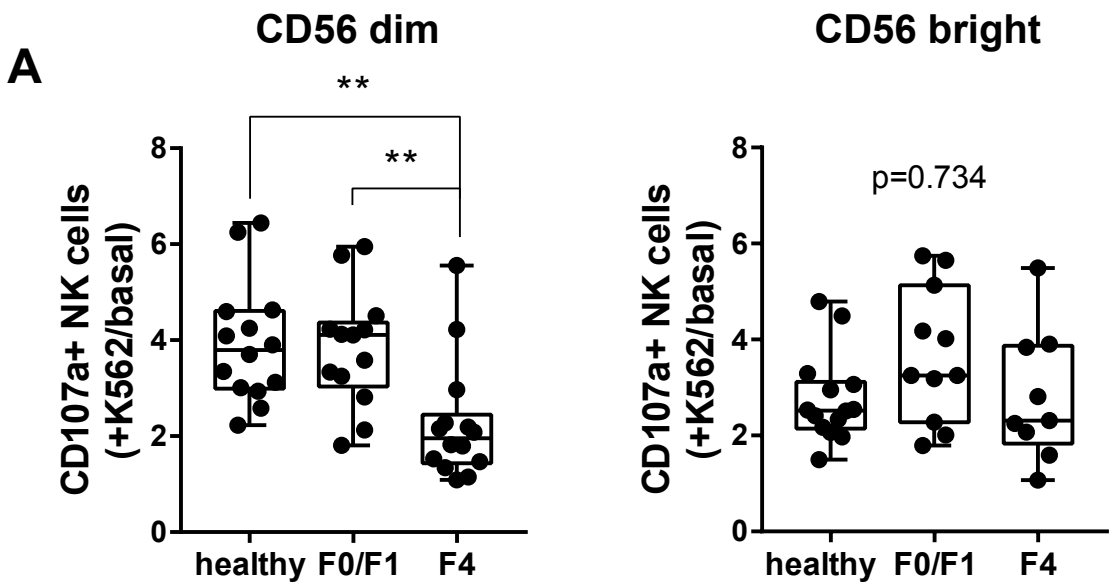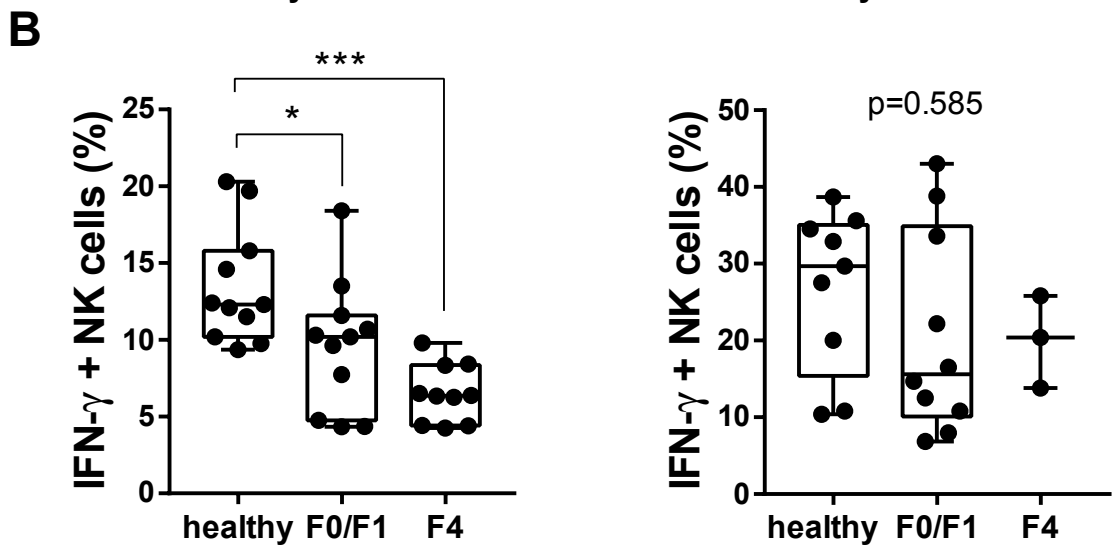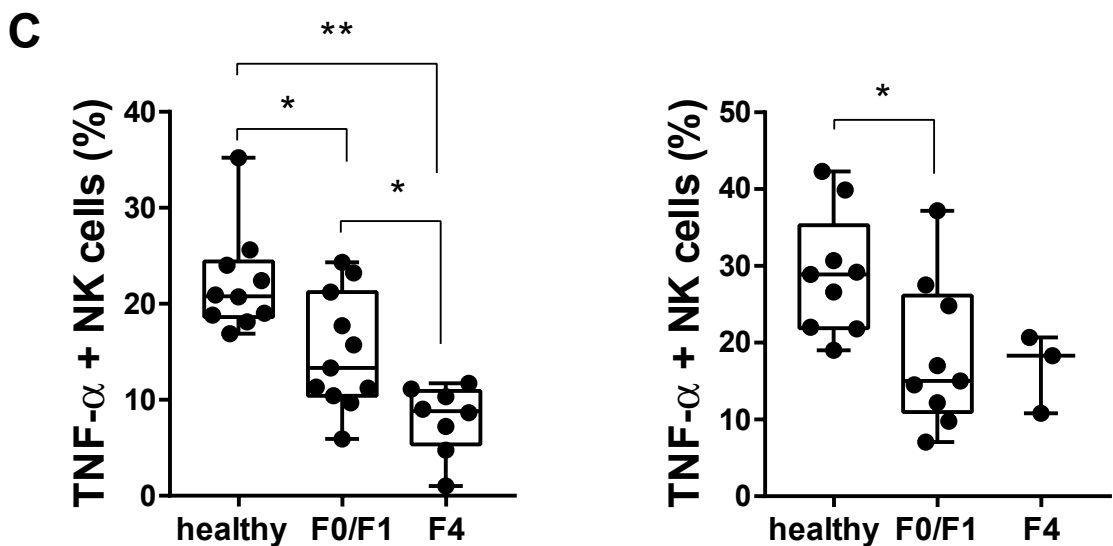

Supplement: JIA2-22-e25375-s003.pdf [file JIA2-22-e25375-s003.pdf]
